# Supplementary material for: Convenient Preparation, Thermal Properties and X-ray Structure Determination of 2,3-Dihydro-5,6,7,8-tetranitro-1,4-benzodioxine (TNBD): A Promising High-Energy-Density Material
Source: MDPI journal article supplement (doi:10.3390/ijms25105099), 2024-05-07
Supplement: s1 [file s1]

# Convenient Preparation, Thermal Properties and X-ray Structure Determination of 2,3-Dihydro-5,6,7,8-tetranitro-1,4-benzodioxine (TNBD): A Promising High-Energy-Density Material

Jonas Šarlauskas

Department of Xenobiotics Biochemistry, Institute of Biochemistry of Vilnius University, Sauletekio 7, LT-10257 Vilnius, Lithuania; jonas.sarlauskas@bchi.vu.lt

**Table S1:** X-ray diffraction analysis data. Geometry tables for the compound TNBD.

## INTRAMOLECULAR BOND LENGTHS

Minimum bond length= 0.80Å : Maximum bond length= 1.60Å

|              |          |              |          |
|--------------|----------|--------------|----------|
| O(1) - C(9)  | 1.338(2) | O(1) - C(2)  | 1.453(2) |
| O(82) - N(8) | 1.212(2) | O(72) - N(7) | 1.212(2) |
| O(81) - N(8) | 1.225(2) | N(7) - O(71) | 1.215(2) |
| N(7) - C(7)  | 1.473(2) | N(8) - C(8)  | 1.472(2) |
| C(7) - C(7)  | 1.383(3) | C(7) - C(8)  | 1.388(2) |
| C(9) - C(9)  | 1.405(3) | C(9) - C(8)  | 1.391(2) |
| C(2) - C(2)  | 1.503(3) | C(2) - H(2A) | 0.92(3)  |
| C(2) - H(2B) | 0.91(2)  |              |          |

## INTRAMOLECULAR BOND ANGLES

Minimum bond length= 0.80Å : Maximum bond length= 1.60Å

|                      |            |                      |            |
|----------------------|------------|----------------------|------------|
| C(9) - O(1) - C(2)   | 113.81(11) | O(72) - N(7) - O(71) | 126.22(14) |
| O(72) - N(7) - C(7)  | 116.99(12) | O(71) - N(7) - C(7)  | 116.79(12) |
| O(82) - N(8) - O(81) | 126.22(13) | O(82) - N(8) - C(8)  | 117.17(12) |
| O(81) - N(8) - C(8)  | 116.61(13) | N(7) - C(7) - C(7)   | 121.79(8)  |

|                     |            |                      |
|---------------------|------------|----------------------|
| N(7) - C(7) - C(8)  | 118.94(13) | C(7) - C(7) - C(8)   |
| 119.18(8)           |            |                      |
| O(1) - C(9) - C(9)  | 122.69(7)  | O(1) - C(9) - C(8)   |
| 118.69(12)          |            |                      |
| C(9) - C(9) - C(8)  | 118.60(8)  | N(8) - C(8) - C(7)   |
| 120.19(12)          |            |                      |
| N(8) - C(8) - C(9)  | 117.51(12) | C(7) - C(8) - C(9)   |
| 122.21(14)          |            |                      |
| O(1) - C(2) - C(2)  | 110.23(11) | O(1) - C(2) - H(2A)  |
| 108.(2)             |            |                      |
| O(1) - C(2) - H(2B) | 105.6(15)  | C(2) - C(2) - H(2A)  |
| 106.(2)             |            |                      |
| C(2) - C(2) - H(2B) | 111.9(14)  | H(2A) - C(2) - H(2B) |
| 115.(2)             |            |                      |

---

INTRAMOLECULAR TORSION ANGLES (H omitted)

---

--

Minimum bond length= 0.80Å : Maximum bond length= 1.60Å

---

--

|                            |             |                |
|----------------------------|-------------|----------------|
| C(2) - O(1) - C(9) - C(9)  | 167.41(11)  | C(2) - O(1) -  |
| C(9) - C(8)                | 165.99(13)  |                |
| C(9) - O(1) - C(2) - C(2)  | -136.50(10) | O(72) - N(7) - |
| C(7) - C(7)                | 43.76(9)    |                |
| O(72) - N(7) - C(7) - C(8) | 47.05(10)   | O(71) - N(7) - |
| C(7) - C(7)                | -135.42(12) |                |
| O(71) - N(7) - C(7) - C(8) | -132.12(14) | O(82) - N(8) - |
| C(8) - C(7)                | -113.15(13) |                |
| O(82) - N(8) - C(8) - C(9) | 70.38(11)   | O(81) - N(8) - |
| C(8) - C(7)                | 67.25(11)   |                |
| O(81) - N(8) - C(8) - C(9) | -109.22(12) | C(7) - C(7) -  |
| N(7) - O(72)               | -136.24(14) |                |
| N(7) - C(7) - C(7) - N(7)  | 0.00(8)     | C(7) - C(7) -  |
| N(7) - O(71)               | 44.58(11)   |                |
| N(7) - C(7) - C(7) - C(8)  | -176.70(13) | C(8) - C(7) -  |
| N(7) - O(72)               | 47.05(10)   |                |
| C(8) - C(7) - N(7) - O(71) | -132.12(14) | N(7) - C(7) -  |
| C(8) - N(8)                | 0.40(9)     |                |
| N(7) - C(7) - C(8) - C(9)  | 176.7(2)    | C(8) - C(7) -  |
| C(7) - N(7)                | 176.70(12)  |                |
| C(7) - C(7) - C(8) - N(8)  | -176.39(15) | C(7) - C(7) -  |
| C(8) - C(9)                | -0.09(10)   |                |

|                            |             |               |
|----------------------------|-------------|---------------|
| C(8) - C(7) - C(7) - C(8)  | 0.00(8)     | O(1) - C(9) - |
| C(9) - O(1)                | 0.00(7)     |               |
| O(1) - C(9) - C(9) - C(8)  | 178.59(13)  | C(9) - C(9) - |
| O(1) - C(2)                | -12.59(9)   |               |
| O(1) - C(9) - C(8) - N(8)  | -1.20(8)    | O(1) - C(9) - |
| C(8) - C(7)                | -177.6(2)   |               |
| C(8) - C(9) - O(1) - C(2)  | 165.99(13)  | C(8) - C(9) - |
| C(9) - O(1)                | -178.59(12) |               |
| C(9) - C(9) - C(8) - N(8)  | 177.44(14)  | C(9) - C(9) - |
| C(8) - C(7)                | 1.05(10)    |               |
| C(8) - C(9) - C(9) - C(8)  | 0.00(8)     | C(7) - C(8) - |
| N(8) - O(82)               | -113.15(13) |               |
| C(7) - C(8) - N(8) - O(81) | 67.25(11)   | N(8) - C(8) - |
| C(7) - N(7)                | 0.40(9)     |               |
| N(8) - C(8) - C(7) - C(7)  | 3.61(8)     | N(8) - C(8) - |
| C(9) - O(1)                | -1.20(8)    |               |
| C(9) - C(8) - N(8) - O(82) | 70.38(11)   | C(9) - C(8) - |
| N(8) - O(81)               | -109.22(12) |               |
| N(8) - C(8) - C(9) - C(9)  | -2.56(7)    | C(7) - C(8) - |
| C(9) - O(1)                | -177.6(2)   |               |
| C(9) - C(8) - C(7) - N(7)  | 176.7(2)    | C(9) - C(8) - |
| C(7) - C(7)                | 179.90(13)  |               |
| C(7) - C(8) - C(9) - C(9)  | -178.95(13) | O(1) - C(2) - |
| C(2) - O(1)                | -0.02(7)    |               |
| C(2) - C(2) - O(1) - C(9)  | 43.50(10)   |               |

# INTERMOLECULAR NON-BONDED DISTANCES

Minimum distance= 1.95Å : Maximum distance= 3.50Å

| Atom(1)<br>y(2) | Atom(2)<br>z(2) | distance   | ns | np | Ta | Tb | Tc | x(2)     |
|-----------------|-----------------|------------|----|----|----|----|----|----------|
| O(1) - O(82)    | 0.59972         | 3.0534(15) | 3  | 1  | 0  | 0  | 1  | 0.19772  |
| O(1) - O(71)    | 0.22086 0.61436 | 3.235(2)   | 2  | 1  | 0  | 1  | 1  | -0.03531 |
| O(1) - N(8)     | 0.04775 0.56425 | 3.448(2)   | 3  | 1  | 0  | 0  | 1  | 0.29370  |
| O(82) - H(2A)   | 0.46537 0.67214 | 3.03(3)    | 3  | 1  | 0  | 0  | 1  | 0.42330  |
| O(82) - H(2B)   | 0.38884 0.62140 | 3.25(2)    | 3  | 1  | 0  | 0  | 1  | 0.53069  |
| O(72) - O(81)   | 1.00975 0.45335 | 3.388(2)   | 3  | 1  | 0  | 1  | 1  | 0.31223  |

|         |   |         |          |   |   |   |   |   |          |
|---------|---|---------|----------|---|---|---|---|---|----------|
| O(72)   | - | C(7)    | 3.457(2) | 5 | 1 | 0 | 0 | 0 | -0.05135 |
| 0.57427 |   | 0.20630 |          |   |   |   |   |   |          |
| O(81)   | - | C(7)    | 3.262(2) | 2 | 1 | 0 | 1 | 1 | -0.05135 |
| 0.42573 |   | 0.70630 |          |   |   |   |   |   |          |
| O(81)   | - | C(8)    | 3.220(2) | 6 | 1 | 0 | 1 | 0 | 0.10141  |
| 0.54512 |   | 0.83681 |          |   |   |   |   |   |          |
| O(81)   | - | C(2)    | 3.461(2) | 3 | 1 | 0 | 0 | 1 | 0.47263  |
| 0.39265 |   | 0.68007 |          |   |   |   |   |   |          |

-----  
ns is the symmetry operator number - (\* denotes inversion indicator)

np is the lattice point number

#### DIHEDRAL ANGLES FORMED BY LSQ PLANES

| PLANE - PLANE                                                            |   | ANGLE  | E.S.D |
|--------------------------------------------------------------------------|---|--------|-------|
| PLANE 1 (C5 C6 C7 C8 C9 C10); PLANE 2 (O71 N7 O72); PLANE 3 (O81 N8 O82) |   |        |       |
| 1                                                                        | 2 | 46.143 | 0.081 |
| 1                                                                        | 3 | 68.706 | 0.103 |
